# Supplementary material
Source: PubMed Central journal article supplement (PMC5737040)
Supplement: 10.4085_0235-16.s1.pdf [file 10.4085_0235-16.s1.pdf]

**Electronic Supplementary Material. Pairwise Correlations Between Model Variables Related to Officials Calling an Injury Timeout for a Suspected Concussion<sup>a</sup>**

|                | Self-Efficacy |           |           |        | Norms   |          |      |       |                |           |         |
|----------------|---------------|-----------|-----------|--------|---------|----------|------|-------|----------------|-----------|---------|
|                | Score         | Important | Certainty | Repeat | Coaches | Athletes | Fans | Media | Administration | Officials | Parents |
| Self-efficacy  |               |           |           |        |         |          |      |       |                |           |         |
| Score          | 1.00          |           |           |        |         |          |      |       |                |           |         |
| Important      | 0.95          | 1.00      |           |        |         |          |      |       |                |           |         |
| Certainty      | 0.51          | 0.51      | 1.00      |        |         |          |      |       |                |           |         |
| Repeat         | 0.71          | 0.72      | 0.57      | 1.00   |         |          |      |       |                |           |         |
| Norms          |               |           |           |        |         |          |      |       |                |           |         |
| Coaches        | 0.31          | 0.30      | 0.29      | 0.29   | 1.00    |          |      |       |                |           |         |
| Athletes       | 0.17          | 0.17      | 0.22      | 0.19   | 0.56    | 1.00     |      |       |                |           |         |
| Fans           | 0.21          | 0.20      | 0.19      | 0.22   | 0.55    | 0.52     | 1.00 |       |                |           |         |
| Media          | 0.19          | 0.18      | 0.14      | 0.18   | 0.48    | 0.35     | 0.67 | 1.00  |                |           |         |
| Administration | 0.26          | 0.26      | 0.21      | 0.22   | 0.62    | 0.35     | 0.46 | 0.48  | 1.00           |           |         |
| Officials      | 0.30          | 0.29      | 0.29      | 0.29   | 0.55    | 0.34     | 0.42 | 0.38  | 0.54           | 1.00      |         |
| Parents        | 0.16          | 0.17      | 0.14      | 0.16   | 0.40    | 0.25     | 0.43 | 0.47  | 0.54           | 0.49      | 1.00    |
| Knowledge      | 0.25          | 0.24      | 0.26      | 0.14   | 0.18    | 0.11     | 0.12 | 0.10  | 0.14           | 0.22      | 0.09    |

<sup>a</sup> All correlations were different at  $P < .001$ . Significance levels have been Bonferroni adjusted for multiple comparisons.
